# Supplementary material for: Fine-mapping markers of lung cancer susceptibility in a sub-region of chromosome 19q13.3 among Chinese
Source: PubMed Central journal article supplement (PMC5308627; doi:10.18632/oncotarget.9279), 2016-05-10
Supplement: oncotarget-07-60929-s001.pdf [file oncotarget-07-60929-s001.pdf]

# Fine-mapping markers of lung cancer susceptibility in a sub-region of chromosome 19q13.3 among Chinese

## Supplementary Material

### Supplementary Methods

#### Assay of Sequenom SNP

Whole assay was performed according to the manufacturer's recommendations [iPLEX® Gold Application Guide (July 22, 2009), SEQUENOM]

1. Design and synthesis of primers and probes

Design software: AssayDesigner3.1.

Synthesis Company: Invitrogen Biotechnology Co., Ltd., Beijing, China.

2. DNA quality test and working dilution

Confirm eligibility DNA by OD test and agarose electrophoresis.

Standard concentration of eligibility DNA: 20~30ng/μl.

3. PCR amplifying

Reagents: Sequenom

Company. PCR instrument:

ABI veriti-384.

Reaction cocktail:

| Reagents               | Volume of Reagents in 5μl |
|------------------------|---------------------------|
| Water, HPLC grade      | 1.8                       |
| 10 x PCR Buffer        | 0.5                       |
| 25mM MgCl <sub>2</sub> | 0.4                       |
| 25mM dNTP Mix          | 0.1                       |
| 0.5uM Primer Mix       | 1                         |
| 5U/μl Taq              | 0.2                       |
| 20ng/μl DNA            | 1                         |
| Final volume [μl]      | 5                         |

Procedure of thermocycling PCR reactions:

|   |       |        |           |
|---|-------|--------|-----------|
| 1 | 94 °C | 15 min |           |
| 2 | 94 °C | 20 sec | 45 cycles |
|   | 56 °C | 30 sec |           |
|   | 72 °C | 1 min  |           |
| 3 | 72 °C | 3 min  |           |
|   | 4°C   | ∞      |           |

#### 4. SAP (Shrimp Alkaline Phosphate) reaction-Neutralizing unincorporated dNTPs

Reagents: Sequenom Company.

PCR instrument: ABI veriti-384.

Reaction cocktail:

| Reagents                   | Volume of reagents in 7 $\mu$ l of SAP cocktail |
|----------------------------|-------------------------------------------------|
| Nanopure water, autoclaved | 1.53                                            |
| SAP Buffer                 | 0.17                                            |
| SAP Enzyme (1.7U/ $\mu$ l) | 0.3                                             |
| PCR reaction products      | 5                                               |
| Final volume [ $\mu$ l]    | 7                                               |

Procedure of SAP reaction:

37 °C 40 min, 85 °C 5 min, 4 °C

$\infty$

#### 5. Extend reaction-Creating the iPLEX gold reaction

Reagents: Sequenom Company.

PCR instrument: ABI veriti-384.

Reaction cocktail:

| Reagents                   | Volume of reagents in 9 $\mu$ l of extend cocktail |
|----------------------------|----------------------------------------------------|
| Nanopure water, autoclaved | 0.619                                              |
| iPLEX Buffer Plus          | 0.2                                                |
| iPLEX Termination mix      | 0.2                                                |
| iPLEX Extend Primer Mix    | 0.94                                               |
| iPLEX Enzyme               | 0.041                                              |
| Volume [ $\mu$ l]          | 2                                                  |
| SAP+PCR reaction products  | 7                                                  |
| Total Volume [ $\mu$ l]    | 9                                                  |

Procedure of extend reaction:

|   |       |        |          |              |
|---|-------|--------|----------|--------------|
| 1 | 94 °C | 30 sec |          |              |
| 2 | 94 °C | 5 sec  |          | 40<br>cycles |
|   | 52 °C | 5 sec  | 5 cycles |              |
|   | 80 °C | 5 sec  |          |              |
| 3 | 72 °C | 3 min  |          |              |
|   | 4°C   | ∞      |          |              |

6. Conditioning the iPLEX gold reaction products

Remove cation component by resin.

7. Dispensing onto SpectroCHIP Arrays

8. Defining assays and plates

9. Acquiring and analyzing spectra

Acquire spectra using the MassARRAY mass spectrometer (Sequenom) and analyze using TyperAnalyzer Software 4.0 (Sequenom).

**Supplementary Table 1:** Haplotype analyses of linkage disequilibrium blocks identified, adjusted by smoking duration

| Haplotype structure <sup>a,b</sup>                                                                                                                                                                                                                               | Case frequency <sup>a</sup> | Control frequency <sup>a</sup> | OR (95%CI) <sup>b</sup>               | P-value <sup>b</sup>     |
|------------------------------------------------------------------------------------------------------------------------------------------------------------------------------------------------------------------------------------------------------------------|-----------------------------|--------------------------------|---------------------------------------|--------------------------|
| <b>Block 1</b> ( $P^c = 0.68$ ). SNPs: <i>ERCC2</i> rs238418(C>A), rs1799787(C>T)                                                                                                                                                                                |                             |                                |                                       |                          |
| CC                                                                                                                                                                                                                                                               | 0.663                       | 0.666                          | 1.0                                   |                          |
| AC                                                                                                                                                                                                                                                               | 0.271                       | 0.274                          | 1.02 (0.80 - 1.30)                    | 0.86                     |
| AT                                                                                                                                                                                                                                                               | 0.066                       | 0.058                          | 1.18 (0.75 - 1.87)                    | 0.47                     |
| <b>Block 2</b> ( $P^c = 0.68$ ). SNPs: <i>ERCC2</i> rs3916874(G>C), rs238415(C>G), rs238414(C>T), rs2070831(C>T), <i>PPP1R13L</i> rs6966(A>T)                                                                                                                    |                             |                                |                                       |                          |
| GGCC                                                                                                                                                                                                                                                             | 0.460                       | 0.447                          | 1.0                                   |                          |
| GCTT                                                                                                                                                                                                                                                             | 0.264                       | 0.269                          | 0.97 (0.75 - 1.25)                    | 0.8                      |
| CCTC                                                                                                                                                                                                                                                             | 0.153                       | 0.174                          | 0.81 (0.60 - 1.09)                    | 0.16                     |
| GCCC                                                                                                                                                                                                                                                             | 0.083                       | 0.070                          | 1.16 (0.77 - 1.74)                    | 0.47                     |
| GCTC                                                                                                                                                                                                                                                             | 0.034                       | 0.036                          | 1.06 (0.57 - 1.96)                    | 0.86                     |
| <b>Block 3</b> ( $P^c = 0.61$ ). SNPs: <i>ERCC2</i> rs238403(C>T), <i>PPP1R13L</i> rs6966(A>T), rs2070830(G>T), rs1970764(A>G), rs35209357(G>C), rs34231843(A>G)                                                                                                 |                             |                                |                                       |                          |
| TAGAGA                                                                                                                                                                                                                                                           | 0.437                       | 0.451                          | 1.0                                   |                          |
| CTTGCG                                                                                                                                                                                                                                                           | 0.270                       | 0.249                          | 1.22 (0.94 - 1.60)                    | 0.14                     |
| CTGGGA                                                                                                                                                                                                                                                           | 0.183                       | 0.178                          | 1.04 (0.77 - 1.40)                    | 0.79                     |
| CAGAGA                                                                                                                                                                                                                                                           | 0.043                       | 0.045                          | 0.89 (0.50 - 1.59)                    | 0.69                     |
| <b>Block 4</b> ( $P^c = 0.11$ ). SNPs: <i>PPP1R13L</i> rs4802252(C>T), rs4803816(T>C)                                                                                                                                                                            |                             |                                |                                       |                          |
| CT                                                                                                                                                                                                                                                               | 0.780                       | 0.749                          | 1.0                                   |                          |
| TC                                                                                                                                                                                                                                                               | 0.214                       | 0.236                          | 0.83 (0.65 - 1.06)                    | 0.13                     |
| <b>Block 5</b> ( $P^c = 0.011$ ). SNPs: <i>PPP1R13L</i> rs4803817(A>G), rs1005165(C>T), <i>CD3EAP</i> rs967591(G>A), rs8113779(G>T), rs1046282(T>C), rs735482(A>C), rs1007616(C>T), rs62109563(T>C), <i>ERCCI</i> rs3212980(A>C), rs3212965(C>T), rs3212964(G>A) |                             |                                |                                       |                          |
| ATATCCCACA                                                                                                                                                                                                                                                       | 0.342                       | 0.294                          | 1.0                                   |                          |
| GCGGCACTCTG                                                                                                                                                                                                                                                      | 0.284                       | 0.310                          | 0.82 (0.62 - 1.08)                    | 0.15                     |
| ACGGTATTACG                                                                                                                                                                                                                                                      | 0.198                       | 0.219                          | <b>0.72 (0.53 - 0.97)<sup>d</sup></b> | <b>0.032<sup>d</sup></b> |
| ATATCCTACA                                                                                                                                                                                                                                                       | 0.076                       | 0.071                          | 0.88 (0.57 - 1.37)                    | 0.58                     |
| ATGTTCCCACA                                                                                                                                                                                                                                                      | 0.020                       | 0.036                          | 0.58 (0.30 - 1.12)                    | 0.11                     |
| <b>Block 6</b> ( $P^c = 0.29$ ). SNPs: <i>ERCCI</i> rs11615(G>A), rs2298881(A>C)                                                                                                                                                                                 |                             |                                |                                       |                          |
| GA                                                                                                                                                                                                                                                               | 0.430                       | 0.401                          | 1.0                                   |                          |
| GC                                                                                                                                                                                                                                                               | 0.351                       | 0.366                          | 0.86 (0.66 - 1.11)                    | 0.24                     |
| AC                                                                                                                                                                                                                                                               | 0.214                       | 0.230                          | 0.81 (0.61 - 1.07)                    | 0.13                     |

<sup>a</sup> Analyzed by Haploview software 4.2. Haplotypes with frequency < 0.03 in both cases and controls were excluded

<sup>b</sup> Analyzed by SNPStats program, adjusted by smoking duration

<sup>c</sup>  $P$  for global haplotype association in the block between cases and controls

<sup>d</sup> Boldface means association with decreased susceptibility of lung cancer

**Supplementary Table 2:** The sequences (5'-3') of primers and probes for 22 SNPs examined by Sequenom MassARRAY

| Gene and rs number           | Primers                                                                 | Probes                       |
|------------------------------|-------------------------------------------------------------------------|------------------------------|
| <b>ERCC2</b><br>rs238418     | F: ACGTTGGATGATTTCGAGGGGCCACAGATG<br>R: ACGTTGGATGTCTCCTGAAAACGCCCAATG  | ACTTCTCTCACCTGCC             |
| rs238415                     | F: ACGTTGGATGGCAAAGGTGTCTTAAGTAGG<br>R: ACGTTGGATGTCTGGCCTTGTGCTTCAATAG | CTGTTACCCAGTCCCCACAGC        |
| rs238414                     | F: ACGTTGGATGTCTGCATTCTCAGCCTGATG<br>R: ACGTTGGATGGTGCAGCATGTAGGAATGGG  | ACACACCCCCATGCC              |
| rs2070831                    | F: ACGTTGGATGAGGTGTGACTTCAGGAAGTG<br>R: ACGTTGGATGGGCTTTTCACACATATCCCC  | GACCTCCTCCTCCTCCC            |
| rs50872                      | F: ACGTTGGATGTTCTCTGGAGGACAAGACATC<br>R: ACGTTGGATGTTCTCATCCCCAACCAC    | CCCTCCCCCTCATCCTTAGG         |
| rs2097215                    | F: ACGTTGGATGAGACTCCGTCAGAAAAG<br>R: ACGTTGGATGATCACTTGGCCAACACTCAC     | ATTGGACAGTAGACATCCTGTGAT     |
| <b>PPPIR13L</b><br>rs8112723 | F: ACGTTGGATGCCTGTAATCCAGCACTTTG<br>R: ACGTTGGATGCCAGGCTGGTTTTGATCTAC   | TTTGATCTACTGACCTCAA          |
| rs201704                     | F: ACGTTGGATGCCAATAGACCTGCAGCTGAG<br>R: ACGTTGGATGTGGTGTAGATGTCTTTGTG   | GGGTATGTTTGTTCATTTTCTTCTAAC  |
| rs2070830                    | F: ACGTTGGATGCATAGACAGGGAATCCTGTG<br>R: ACGTTGGATGCCAGCTTTCTCCAAGTTTC   | TAGTTTCAGGGCCCAA             |
| rs10418623                   | F: ACGTTGGATGATGCCTGGTTTGGAGACCAGC<br>R: ACGTTGGATGCACCACCCTCCAGATAAT   | CCTCCCAGATAATATTTAACATTTT    |
| rs35209357                   | F: CGTTGGATGAAGATCAGCAGGAGACCATC<br>R: ACGTTGGATGCTTAGCATAATACCTGGCAC   | ACTGTAACTGCTCTTACT           |
| rs34231843                   | F: ACGTTGGATGTTAACCACCAGGACCAGATG<br>R: ACGTTGGATGAGGGAGAAAGCAAAACGCTG  | AGAAGTACGATAAATAGCTAGA       |
| rs4803816                    | F: ACGTTGGATGCTGGGTTAGACAAATTGGAG<br>R: ACGTTGGATGCCTAAACCCCTCAGCTAAAG  | GCCTATTGTTGGAAAGTT           |
| rs1005165                    | F: ACGTTGGATGACCCACTTCCCTTCCACTG<br>R: ACGTTGGATGACTGGCCAGGAATGCAGTCG   | ATGCAGTCGGGTCAC              |
| <b>CD3EAP</b><br>rs8113779   | F: ACGTTGGATGCAGGATGGAGGAGCCCCAG<br>R: ACGTTGGATGCCCTTTCTCCTTCCACCAAC   | GTGCCACCAACGCACCCT           |
| rs3212986                    | F: ACGTTGGATGCTTTAGTTCCTCAGTTTCCC<br>R: ACGTTGGATGCACAGGCCGGGACAAGAAG   | AAAAGGCCGGGACAAGAAGCGGAAG    |
| rs1007616                    | F: ACGTTGGATGCTGGGTAATCTAGAGTGGG<br>R: ACGTTGGATGACTGGATTGTTTGTAACTC    | GGGATGATTGTTTGTAACTCAATGGATA |
| rs62109563                   | F: ACGTTGGATGCATGAGATCCTGTCAATTAC<br>R: ACGTTGGATGCTGTGCCTGGCTTATTTAC   | TAACATAATAATCCCCAGTTCA       |
| <b>ERCCI</b><br>rs3212967    | F: ACGTTGGATGCTGTAATCCAGCTACTAGG<br>R: ACGTTGGATGGATCTTGGCTCACTGCAACG   | GGCTTCTCCCGGGTTCAAGCAGTTC    |

|           |                                                                        |                            |
|-----------|------------------------------------------------------------------------|----------------------------|
| rs3212965 | F: ACGTTGGATGACCTGTCCCCAGACACTGAT<br>R: ACGTTGGATGAAGAAGCCCTCCCTGATCC  | CGCAGCCCTGGCCACT           |
| rs3212955 | F: ACGTTGGATGAACACAGGGTCCCACCAAG<br>R: ACGTTGGATGAGGGTCATGTCCCAGTGTTTC | AGGTGTTCTGGACTGTTCT        |
| rs3212950 | F: ACGTTGGATGGTCAGGAGTTCGAGACCAG<br>R: ACGTTGGATGTGAACACTTCCTGCCCTCAC  | CGGAGAGATGGGGTGTCCACCATATT |

|          |            | Linkage Disequilibrium                                 |                                                         |                                                         |                                                          |                                                          |                                                          |
|----------|------------|--------------------------------------------------------|---------------------------------------------------------|---------------------------------------------------------|----------------------------------------------------------|----------------------------------------------------------|----------------------------------------------------------|
|          |            | rs1005165                                              | rs967591                                                | rs735482                                                | rs1007616                                                | rs62109563                                               | rs3212965                                                |
| Marker 1 | rs1970764  | 0.0835<br>0.357<br>0.3259<br>138.4<br>$< 2e-16$<br>702 | 0.0847<br>0.386<br>0.3432<br>167.7<br>$< 2e-16$<br>712  | 0.0785<br>0.329<br>0.3153<br>127.0<br>$< 2e-16$<br>639  | 0.0193<br>0.158<br>0.0914<br>118<br>0.000595<br>706      | 0.0832<br>0.428<br>0.3442<br>167.5<br>$< 2e-16$<br>707   | -0.0964<br>0.634<br>-0.4148<br>242.6<br>$< 2e-16$<br>703 |
|          | rs1005165  |                                                        | 0.2268<br>0.976<br>0.9231<br>1196.3<br>$< 2e-16$<br>702 | 0.2380<br>0.978<br>0.9601<br>1218.5<br>$< 2e-16$<br>661 | -0.1006<br>0.955<br>-0.4774<br>344.7<br>$< 2e-16$<br>756 | 0.2027<br>0.986<br>0.8424<br>1078.6<br>$< 2e-16$<br>760  | -0.1373<br>0.964<br>-0.3931<br>532.6<br>$< 2e-16$<br>757 |
|          | rs967591   |                                                        |                                                         | 0.2235<br>0.978<br>0.9081<br>1033.9<br>$< 2e-16$<br>639 | -0.0947<br>0.957<br>-0.4527<br>229.4<br>$< 2e-16$<br>706 | 0.1826<br>0.846<br>0.7644<br>826.1<br>$< 2e-16$<br>707   | -0.1249<br>0.934<br>-0.5435<br>416.4<br>$< 2e-16$<br>703 |
|          | rs735482   |                                                        |                                                         |                                                         | -0.1022<br>0.950<br>-0.4843<br>310.5<br>$< 2e-16$<br>662 | 0.1987<br>0.983<br>0.8245<br>901.4<br>$< 2e-16$<br>663   | -0.1335<br>0.919<br>-0.5759<br>439.1<br>$< 2e-16$<br>662 |
|          | rs1007616  |                                                        |                                                         |                                                         |                                                          | -0.0843<br>0.963<br>-0.4114<br>236.9<br>$< 2e-16$<br>759 | -0.0668<br>0.899<br>-0.3388<br>173.6<br>$< 2e-16$<br>756 |
|          | rs62109563 |                                                        |                                                         |                                                         |                                                          |                                                          | -0.1117<br>0.944<br>-0.4963<br>375.4<br>$< 2e-16$<br>762 |
|          | rs3212965  |                                                        |                                                         |                                                         |                                                          |                                                          |                                                          |
|          |            | Marker 2                                               |                                                         |                                                         |                                                          |                                                          |                                                          |

**Supplementary Figure 1:** Linkage disequilibrium analysis of the seven polymorphisms with statistically significant association with lung cancer risk (from 3' to 5': rs1970764, rs1005165, rs967591, rs735482, rs1007616, rs62109563, rs3212965). The figure was generated using the SNPStats program.
